# Supplementary material for: SARS-CoV-2 Omicron (B.1.1.529) Infection of Wild White-Tailed Deer in New York City
Source: MDPI journal article supplement (doi:10.3390/v14122770), 2022-12-12
Supplement: s1 [file s1]

**Supplementary Table S1. Metadata associated with the deer samples collected from Staten Island, NY.**

| ID   | Capture Date | Age (years) | Sex | RT-PCR result | RT-PCR Ct | sVNT result | sVNT (inhibition %) | pVNT (NT <sub>50</sub> ) |       |       |       |       |         |
|------|--------------|-------------|-----|---------------|-----------|-------------|---------------------|--------------------------|-------|-------|-------|-------|---------|
|      |              |             |     |               |           |             |                     | Wild type B.1            | Alpha | Beta  | Gamma | Delta | Omicron |
| 80   | 12/12/2021   | 0.5         | M   | ND            | ND        | NEG         | 3.73                |                          |       |       |       |       |         |
| 90   | 1/11/2022    | 0.5         | F   | NEG           | UN        | NEG         | 10.58               |                          |       |       |       |       |         |
| 97   | 1/19/2022    | 0.5         | F   | ND            | ND        | NEG         | 7.44                |                          |       |       |       |       |         |
| 100  | 1/9/2022     | 0.5         | F   | NEG           | UN        | NEG         | 8.89                |                          |       |       |       |       |         |
| 101  | 1/20/2022    | 3.5         | F   | NEG           | UN        | NEG         | 7.71                |                          |       |       |       |       |         |
| 102  | 1/6/2022     | 0.5         | F   | POS           | 30.64     | ND          | ND                  |                          |       |       |       |       |         |
| 103  | 1/6/2022     | 0.5         | F   | POS           | 32.14     | NEG         | 8.85                |                          |       |       |       |       |         |
| 104  | 1/6/2022     | 0.5         | F   | POS           | 35.57     | NEG         | 7.81                |                          |       |       |       |       |         |
| 106  | 1/27/2022    | 2.5         | F   | NEG           | UN        | NEG         | 22.69               |                          |       |       |       |       |         |
| 120  | 12/18/2021   | 0.5         | F   | ND            | ND        | NEG         | 10.99               |                          |       |       |       |       |         |
| 121  | 1/9/2022     | 0.5         | F   | ND            | ND        | NEG         | 11.31               |                          |       |       |       |       |         |
| 123  | 1/5/2022     | 0.5         | F   | NEG           | UN        | NEG         | 2.56                |                          |       |       |       |       |         |
| 1584 | 12/12/2021   | 3.5         | M   | ND            | ND        | POS         | 74.72               | 281.2                    | 197.9 | 34.19 | 43.53 | 76.23 | ND      |
| 2002 | 12/15/2021   | 1.5         | M   | ND            | ND        | NEG         | 28.82               |                          |       |       |       |       |         |
| 2003 | 12/14/2021   | 2.5         | M   | ND            | ND        | NEG         | 2.5                 |                          |       |       |       |       |         |
| 2004 | 12/13/2021   | 1.5         | M   | ND            | ND        | POS         | 93.97               | 1681                     | 849.6 | 282.2 | 545.8 | 595.8 | 247.5   |
| 2005 | 12/13/2021   | 0.5         | M   | ND            | ND        | NEG         | 8.4                 |                          |       |       |       |       |         |
| 2006 | 12/29/2021   | 0.5         | M   | ND            | ND        | NEG         | 2.5                 |                          |       |       |       |       |         |
| 2007 | 12/29/2021   | 0.5         | M   | ND            | ND        | NEG         | 3.08                |                          |       |       |       |       |         |
| 2008 | 12/15/2021   | 1.5         | M   | ND            | ND        | NEG         | 0.36                |                          |       |       |       |       |         |
| 2009 | 12/15/2021   | 1.5         | M   | ND            | ND        | NEG         | -2.11               |                          |       |       |       |       |         |
| 2010 | 12/15/2021   | 0.5         | M   | ND            | ND        | NEG         | 2.82                |                          |       |       |       |       |         |
| 2011 | 12/16/2021   | 1.5         | M   | ND            | ND        | NEG         | 3.01                |                          |       |       |       |       |         |
| 2012 | 12/16/2021   | 0.5         | M   | ND            | ND        | NEG         | 3.27                |                          |       |       |       |       |         |
| 2013 | 12/15/2021   | 0.5         | M   | ND            | ND        | NEG         | 3.47                |                          |       |       |       |       |         |
| 2014 | 12/20/2021   | 1.5         | M   | ND            | ND        | NEG         | 4.51                |                          |       |       |       |       |         |

| ID   | Capture Date | Age (years) | Sex | RT-PCR result | RT-PCR Ct | sVNT result | sVNT (inhibition %) | pVNT (NT <sub>50</sub> ) |       |       |       |       |         |
|------|--------------|-------------|-----|---------------|-----------|-------------|---------------------|--------------------------|-------|-------|-------|-------|---------|
|      |              |             |     |               |           |             |                     | Wild type B.1            | Alpha | Beta  | Gamma | Delta | Omicron |
| 2015 | 12/17/2021   | 0.5         | M   | ND            | ND        | POS         | 87.75               | 340                      | 157.3 | 64.05 | 67.17 | 1028  | 55.79   |
| 2016 | 12/18/2021   | 0.5         | M   | ND            | ND        | NEG         | -6.84               |                          |       |       |       |       |         |
| 2018 | 12/18/2021   | 1.5         | M   | ND            | ND        | NEG         | 9.82                |                          |       |       |       |       |         |
| 2019 | 12/19/2021   | 2.5         | M   | ND            | ND        | NEG         | 8.14                |                          |       |       |       |       |         |
| 2020 | 12/16/2021   | 0.5         | M   | ND            | ND        | NEG         | 2.3                 |                          |       |       |       |       |         |
| 2021 | 12/19/2021   | 0.5         | M   | ND            | ND        | NEG         | 0.75                |                          |       |       |       |       |         |
| 2022 | 12/17/2021   | 0.5         | M   | ND            | ND        | NEG         | 5.28                |                          |       |       |       |       |         |
| 2023 | 12/22/2021   | 1.5         | M   | ND            | ND        | NEG         | 3.92                |                          |       |       |       |       |         |
| 2025 | 12/18/2021   | 1.5         | M   | ND            | ND        | POS         | 92.35               | 606.3                    | 337.8 | 51.24 | 107.2 | 1228  | 25.91   |
| 2026 | 12/18/2021   | 0.5         | M   | ND            | ND        | NEG         | 3.73                |                          |       |       |       |       |         |
| 2028 | 12/20/2021   | 0.5         | M   | ND            | ND        | NEG         | 6.77                |                          |       |       |       |       |         |
| 2029 | 12/20/2021   | 0.5         | M   | ND            | ND        | NEG         | 1.52                |                          |       |       |       |       |         |
| 2031 | 12/22/2021   | 0.5         | M   | ND            | ND        | NEG         | 2.5                 |                          |       |       |       |       |         |
| 2032 | 12/21/2021   | 0.5         | M   | ND            | ND        | NEG         | 2.24                |                          |       |       |       |       |         |
| 2033 | 12/31/2021   | 1.5         | M   | ND            | ND        | POS         | 68.62               | 490.4                    | 215.5 | 126.8 | 149.8 | 260.7 | 50.23   |
| 2034 | 12/30/2021   | 0.5         | M   | ND            | ND        | NEG         | 3.21                |                          |       |       |       |       |         |
| 2035 | 12/21/2021   | 1.5         | M   | ND            | ND        | POS         | 33.16               | 169.5                    | 132.6 | 123.5 | 80.91 | 127   | 19.18   |
| 2036 | 12/28/2021   | 1.5         | M   | ND            | ND        | POS         | 60                  | 157                      | 153.1 | 66.79 | 145.4 | 127.2 | 44.03   |
| 2038 | 12/22/2021   | 0.5         | M   | ND            | ND        | NEG         | 15.59               |                          |       |       |       |       |         |
| 2039 | 12/29/2021   | 0.5         | M   | ND            | ND        | NEG         | 19.55               |                          |       |       |       |       |         |
| 2040 | 12/30/2021   | 1.5         | M   | ND            | ND        | POS         | 51.83               | 144.4                    | 95.13 | 86.28 | 124.8 | 194.5 | 62.82   |
| 2041 | 12/30/2021   | 1.5         | M   | ND            | ND        | NEG         | 10.08               |                          |       |       |       |       |         |
| 2042 | 12/31/2021   | 0.5         | M   | ND            | ND        | NEG         | 11.31               |                          |       |       |       |       |         |
| 2043 | 1/1/2022     | 0.5         | M   | ND            | ND        | NEG         | 2.5                 |                          |       |       |       |       |         |
| 2044 | 12/31/2021   | 1.5         | M   | ND            | ND        | NEG         | 1.07                |                          |       |       |       |       |         |
| 2045 | 12/30/2021   | 1.5         | M   | ND            | ND        | POS         | 46.97               | 347.7                    | 182.8 | 175.4 | 194.4 | 137.7 | 30.65   |
| 2047 | 1/2/2022     | 2.5         | M   | ND            | ND        | NEG         | 16.24               |                          |       |       |       |       |         |
| 2048 | 1/3/2022     | 0.5         | M   | NEG           | UN        | NEG         | 10.47               |                          |       |       |       |       |         |

| ID   | Capture Date | Age (years) | Sex | RT-PCR result | RT-PCR Ct | sVNT result | sVNT (inhibition %) | pVNT (NT <sub>50</sub> ) |       |       |       |       |         |
|------|--------------|-------------|-----|---------------|-----------|-------------|---------------------|--------------------------|-------|-------|-------|-------|---------|
|      |              |             |     |               |           |             |                     | Wild type B.1            | Alpha | Beta  | Gamma | Delta | Omicron |
| 2049 | 1/4/2022     | 1.5         | M   | NEG           | UN        | NEG         | 15.82               |                          |       |       |       |       |         |
| 2050 | 12/31/2021   | 1.5         | M   | ND            | ND        | NEG         | 3.47                |                          |       |       |       |       |         |
| 2051 | 1/3/2022     | 1.5         | M   | NEG           | UN        | NEG         | 11.31               |                          |       |       |       |       |         |
| 2052 | 1/1/2022     | 1.5         | M   | ND            | ND        | NEG         | 1.85                |                          |       |       |       |       |         |
| 2053 | 1/4/2022     | 1.5         | M   | NEG           | UN        | NEG         | 7.23                |                          |       |       |       |       |         |
| 2054 | 1/4/2022     | 0.5         | M   | NEG           | UN        | NEG         | 0.94                |                          |       |       |       |       |         |
| 2055 | 1/4/2022     | 1.5         | M   | NEG           | UN        | POS         | 97.02               | 2406                     | 1718  | 1741  | 1427  | 1526  | 273.6   |
| 2056 | 1/7/2022     | 0.5         | M   | NEG           | UN        | NEG         | 3.29                |                          |       |       |       |       |         |
| 2057 | 1/2/2022     | 0.5         | M   | ND            | ND        | NEG         | 6.06                |                          |       |       |       |       |         |
| 2058 | 1/2/2022     | 0.5         | M   | ND            | ND        | NEG         | 8.14                |                          |       |       |       |       |         |
| 2059 | 1/7/2022     | 3.5         | M   | NEG           | UN        | NEG         | 4.64                |                          |       |       |       |       |         |
| 2060 | 1/2/2022     | 1.5         | M   | ND            | ND        | NEG         | 6.04                |                          |       |       |       |       |         |
| 2061 | 1/8/2022     | 0.5         | M   | NEG           | UN        | NEG         | 7.82                |                          |       |       |       |       |         |
| 2062 | 1/5/2022     | 1.5         | M   | NEG           | UN        | POS         | 70.89               | 337.1                    | 145.5 | 142.4 | 187.2 | 278.8 | 119.3   |
| 2063 | 1/6/2022     | 1.5         | M   | NEG           | UN        | ND          | ND                  |                          |       |       |       |       |         |
| 2064 | 1/5/2022     | 0.5         | M   | NEG           | UN        | POS         | 69.66               | 100.3                    | 73.54 | 32.34 | 34.38 | 313.2 | 28.5    |
| 2065 | 1/6/2022     | 0.5         | M   | NEG           | UN        | ND          | ND                  |                          |       |       |       |       |         |
| 2066 | 1/7/2022     | 1.5         | M   | NEG           | UN        | NEG         | -0.8                |                          |       |       |       |       |         |
| 2067 | 1/7/2022     | 0.5         | M   | POS           | 36.3      | NEG         | 7.36                |                          |       |       |       |       |         |
| 2068 | 1/9/2022     | 0.5         | M   | NEG           | UN        | ND          | ND                  |                          |       |       |       |       |         |
| 2070 | 1/6/2022     | 1.5         | M   | ND            | ND        | NEG         | 8.91                |                          |       |       |       |       |         |
| 2071 | 1/8/2022     | 2.5         | M   | NEG           | UN        | POS         | 96.37               | 1916                     | 1329  | 396.8 | 276.7 | 1803  | 77.12   |
| 2072 | 1/13/2022    | 0.5         | M   | NEG           | UN        | NEG         | 14.42               |                          |       |       |       |       |         |
| 2073 | 1/10/2022    | 0.5         | M   | NEG           | UN        | NEG         | 12.8                |                          |       |       |       |       |         |
| 2074 | 1/8/2022     | 0.5         | M   | NEG           | UN        | NEG         | 7.47                |                          |       |       |       |       |         |
| 2075 | 1/14/2022    | 1.5         | M   | NEG           | UN        | POS         | 78.48               | 360.3                    | 417   | 106.8 | 73.32 | 245.5 | 44.24   |
| 2076 | 1/9/2022     | 0.5         | M   | NEG           | UN        | NEG         | 11.9                |                          |       |       |       |       |         |
| 2077 | 1/10/2022    | 1.5         | M   | NEG           | UN        | POS         | 34.31               | 75.59                    | 64.01 | 54.68 | 56.65 | 84.94 | 49.34   |

| ID   | Capture Date | Age (years) | Sex | RT-PCR result | RT-PCR Ct | sVNT result | sVNT (inhibition %) | pVNT (NT <sub>50</sub> ) |       |       |       |       |         |
|------|--------------|-------------|-----|---------------|-----------|-------------|---------------------|--------------------------|-------|-------|-------|-------|---------|
|      |              |             |     |               |           |             |                     | Wild type B.1            | Alpha | Beta  | Gamma | Delta | Omicron |
| 2078 | 1/10/2022    | 0.5         | M   | NEG           | UN        | NEG         | 5.22                |                          |       |       |       |       |         |
| 2079 | 1/10/2022    | 2.5         | M   | NEG           | UN        | NEG         | 6.84                |                          |       |       |       |       |         |
| 2080 | 1/9/2022     | 0.5         | M   | NEG           | UN        | NEG         | 20.52               |                          |       |       |       |       |         |
| 2081 | 1/12/2022    | 2.5         | M   | NEG           | UN        | NEG         | 10.41               |                          |       |       |       |       |         |
| 2082 | 1/10/2022    | 1.5         | M   | NEG           | UN        | NEG         | 10.28               |                          |       |       |       |       |         |
| 2083 | 1/11/2022    | 0.5         | M   | NEG           | UN        | NEG         | 5.87                |                          |       |       |       |       |         |
| 2084 | 1/10/2022    | 0.5         | M   | NEG           | UN        | NEG         | 10.28               |                          |       |       |       |       |         |
| 2085 | 1/12/2022    | 3.5         | M   | NEG           | UN        | NEG         | 3.73                |                          |       |       |       |       |         |
| 2086 | 1/11/2022    | 1.5         | M   | NEG           | UN        | NEG         | 12.22               |                          |       |       |       |       |         |
| 2087 | 1/15/2022    | 0.5         | M   | NEG           | UN        | NEG         | 0.09                |                          |       |       |       |       |         |
| 2088 | 1/14/2022    | 2.5         | M   | NEG           | UN        | NEG         | 9.91                |                          |       |       |       |       |         |
| 2089 | 1/16/2022    | 1.5         | M   | POS           | 36.12     | POS         | 78.74               | 1020                     | 367.8 | 336.6 | 337.6 | 858.5 | 42.49   |
| 2090 | 1/15/2022    | 0.5         | M   | NEG           | UN        | NEG         | 8.98                |                          |       |       |       |       |         |
| 2091 | 1/11/2022    | 2.5         | M   | NEG           | UN        | NEG         | 0.94                |                          |       |       |       |       |         |
| 2092 | 1/25/2022    | 0.5         | M   | ND            | ND        | NEG         | -5.83               |                          |       |       |       |       |         |
| 2093 | 1/16/2022    | 0.5         | M   | NEG           | UN        | NEG         | 6.19                |                          |       |       |       |       |         |
| 2094 | 1/14/2022    | 0.5         | M   | NEG           | UN        | ND          | ND                  |                          |       |       |       |       |         |
| 2095 | 1/20/2022    | 3.5         | M   | NEG           | UN        | NEG         | 3.14                |                          |       |       |       |       |         |
| 2096 | 1/16/2022    | 0.5         | M   | NEG           | UN        | NEG         | 6                   |                          |       |       |       |       |         |
| 2097 | 1/15/2022    | 0.5         | M   | NEG           | UN        | NEG         | 12.16               |                          |       |       |       |       |         |
| 2098 | 1/17/2022    | 0.5         | M   | NEG           | UN        | NEG         | 5.2                 |                          |       |       |       |       |         |
| 2099 | 1/12/2022    | 0.5         | M   | NEG           | UN        | NEG         | 13.52               |                          |       |       |       |       |         |
| 2100 | 1/17/2022    | 0.5         | M   | NEG           | UN        | NEG         | 9.87                |                          |       |       |       |       |         |
| 2101 | 1/23/2022    | 0.5         | M   | ND            | ND        | NEG         | 13.36               |                          |       |       |       |       |         |
| 2102 | 1/13/2022    | 0.5         | M   | NEG           | UN        | NEG         | 24.15               |                          |       |       |       |       |         |
| 2103 | 1/18/2022    | 0.5         | M   | POS           | 37        | POS         | 93.99               | 725.8                    | 910.5 | 797.5 | 875.7 | 1829  | 261.6   |
| 2104 | 1/24/2022    | 0.5         | M   | ND            | ND        | NEG         | -3.05               |                          |       |       |       |       |         |
| 2105 | 1/18/2022    | 0.5         | M   | NEG           | UN        | NEG         | -3.41               |                          |       |       |       |       |         |

| ID    | Capture Date | Age (years) | Sex | RT-PCR result | RT-PCR Ct | sVNT result | sVNT (inhibition %) | pVNT (NT <sub>50</sub> ) |       |       |       |       |         |
|-------|--------------|-------------|-----|---------------|-----------|-------------|---------------------|--------------------------|-------|-------|-------|-------|---------|
|       |              |             |     |               |           |             |                     | Wild type B.1            | Alpha | Beta  | Gamma | Delta | Omicron |
| 2106  | 1/20/2022    | 2.5         | M   | NEG           | UN        | NEG         | 12.02               |                          |       |       |       |       |         |
| 2107  | 1/23/2022    | 0.5         | M   | ND            | ND        | NEG         | 3.05                |                          |       |       |       |       |         |
| 2108  | 1/27/2022    | 0.5         | M   | POS           | 22.5      | NEG         | 5.11                |                          |       |       |       |       |         |
| 2109  | 1/21/2022    | 0.5         | M   | ND            | ND        | POS         | 83.14               | 351.3                    | 291.2 | 75.84 | 113.4 | 501.9 | 43.48   |
| 2110  | 1/18/2022    | 0.5         | M   | NEG           | UN        | NEG         | 3.95                |                          |       |       |       |       |         |
| 2111  | 1/24/2022    | 0.5         | M   | ND            | ND        | NEG         | 6.64                |                          |       |       |       |       |         |
| 2112  | 1/25/2022    | 0.5         | M   | ND            | ND        | NEG         | -10.49              |                          |       |       |       |       |         |
| 2113  | 1/24/2022    | 0.5         | M   | ND            | ND        | NEG         | -8.52               |                          |       |       |       |       |         |
| 2114  | 1/25/2022    | 0.5         | M   | ND            | ND        | NEG         | 8.61                |                          |       |       |       |       |         |
| 2115  | 1/26/2022    | 0.5         | M   | ND            | ND        | NEG         | 4.3                 |                          |       |       |       |       |         |
| 2116  | 1/25/2022    | 1.5         | M   | ND            | ND        | NEG         | 5.38                |                          |       |       |       |       |         |
| 2117  | 1/28/2022    | 0.5         | M   | NEG           | UN        | NEG         | 6.64                |                          |       |       |       |       |         |
| 2118  | 1/24/2022    | 0.5         | M   | ND            | ND        | NEG         | 2.42                |                          |       |       |       |       |         |
| 2119  | 1/26/2022    | 0.5         | M   | ND            | ND        | NEG         | 8.79                |                          |       |       |       |       |         |
| 2120  | 1/27/2022    | 0.5         | M   | NEG           | UN        | NEG         | 1.08                |                          |       |       |       |       |         |
| 2121  | 1/25/2022    | 0.5         | M   | ND            | ND        | NEG         | 6.19                |                          |       |       |       |       |         |
| 2122  | 1/26/2022    | 0.5         | M   | ND            | ND        | NEG         | 2.6                 |                          |       |       |       |       |         |
| 2123  | 1/27/2022    | 2.5         | M   | NEG           | UN        | NEG         | 24.66               |                          |       |       |       |       |         |
| 2124  | 1/27/2022    | 1.5         | M   | NEG           | UN        | POS         | 92.38               | 1426                     | 929.3 | 166.7 | 254.3 | 535.8 | 84.15   |
| 2125  | 1/30/2022    | 0.5         | M   | POS           | 31.1      | NEG         | 4.13                |                          |       |       |       |       |         |
| 2126  | 1/30/2022    | 0.5         | M   | NEG           | UN        | NEG         | 1.79                |                          |       |       |       |       |         |
| 40101 | 1/19/2022    | 0.5         | F   | NEG           | UN        | NEG         | -0.27               |                          |       |       |       |       |         |
| 40105 | 1/19/2022    | 0.5         | F   | NEG           | UN        | NEG         | 2.24                |                          |       |       |       |       |         |
| 40109 | 1/18/2022    | 0.5         | F   | ND            | ND        | NEG         | -13.18              |                          |       |       |       |       |         |
| 40115 | 1/23/2022    | 0.5         | F   | ND            | ND        | NEG         | 11.75               |                          |       |       |       |       |         |
| 40129 | 1/20/2022    | 0.5         | F   | NEG           | UN        | NEG         | 8.34                |                          |       |       |       |       |         |

F: Female; M: Male; NEG: Negative; POS: Positive; ND: Not done; UN: Undetermined; sVNT: Virus neutralization using the surrogate virus neutralization assay; pVNT: Virus neutralization using pseudo virus.

**Supplemental Table S2. Metadata associated with the phylogenetic tree presented in Figure 1B.**

| Identification number   | Host              | Collection date | Lineage | Location      |
|-------------------------|-------------------|-----------------|---------|---------------|
| NY WTD102 <sup>#</sup>  | White-Tailed Deer | 1/6/2022        | BA.1    | New York, USA |
| NY WTD103 <sup>#</sup>  | White-Tailed Deer | 1/6/2022        | BA.1    | New York, USA |
| NY WTD104 <sup>#</sup>  | White-Tailed Deer | 1/6/2022        | BA.1    | New York, USA |
| NY WTD2067 <sup>#</sup> | White-Tailed Deer | 1/7/2022        | BA.1    | New York, USA |
| NY WTD2108 <sup>#</sup> | White-Tailed Deer | 1/27/2022       | AY.39   | New York, USA |
| NY WTD2103 <sup>#</sup> | White-Tailed Deer | 1/18/2022       | AY.103  | New York, USA |
| NY WTD2125 <sup>#</sup> | White-Tailed Deer | 1/30/2022       | AY.39   | New York, USA |
| NY WTD2089 <sup>#</sup> | White-Tailed Deer | 1/16/2022       | AY.103  | New York, USA |
| EPI_ISL_9347713         | White-Tailed Deer | 12/1/2021       | AY.54   | Arkansas, USA |
| EPI_ISL_9347714         | White-Tailed Deer | 12/1/2021       | AY.45   | Arkansas, USA |
| EPI_ISL_5804716         | White-Tailed Deer | 12/5/2020       | B.1.119 | Iowa, USA     |
| EPI_ISL_5804724         | White-Tailed Deer | 12/8/2020       | B.1.311 | Iowa, USA     |
| EPI_ISL_6425277         | White-Tailed Deer | 12/8/2020       | B.1.119 | Iowa, USA     |
| EPI_ISL_5804743         | White-Tailed Deer | 12/8/2020       | B.1.311 | Iowa, USA     |
| EPI_ISL_5804751         | White-Tailed Deer | 12/8/2020       | B.1.311 | Iowa, USA     |
| EPI_ISL_6425281         | White-Tailed Deer | 12/8/2020       | B.1.311 | Iowa, USA     |
| EPI_ISL_5804735         | White-Tailed Deer | 12/5/2020       | B.1.264 | Iowa, USA     |
| EPI_ISL_5804765         | White-Tailed Deer | 1/9/2021        | B.1.311 | Iowa, USA     |
| EPI_ISL_5804774         | White-Tailed Deer | 1/9/2021        | B.1.311 | Iowa, USA     |
| EPI_ISL_6425287         | White-Tailed Deer | 1/9/2021        | B.1.311 | Iowa, USA     |
| EPI_ISL_5804717         | White-Tailed Deer | 12/5/2020       | B.1.311 | Iowa, USA     |
| EPI_ISL_6425280         | White-Tailed Deer | 12/5/2020       | B.1.311 | Iowa, USA     |
| EPI_ISL_5804718         | White-Tailed Deer | 12/5/2020       | B.1.311 | Iowa, USA     |
| EPI_ISL_5804719         | White-Tailed Deer | 12/5/2020       | B.1.311 | Iowa, USA     |
| EPI_ISL_5804720         | White-Tailed Deer | 12/5/2020       | B.1.311 | Iowa, USA     |
| EPI_ISL_5804721         | White-Tailed Deer | 12/5/2020       | B.1.311 | Iowa, USA     |
| EPI_ISL_5804722         | White-Tailed Deer | 12/5/2020       | B.1.311 | Iowa, USA     |
| EPI_ISL_6425271         | White-Tailed Deer | 12/5/2020       | B.1.311 | Iowa, USA     |
| EPI_ISL_6425278         | White-Tailed Deer | 12/5/2020       | B.1.311 | Iowa, USA     |

| Identification number | Host              | Collection date | Lineage | Location  |
|-----------------------|-------------------|-----------------|---------|-----------|
| EPI_ISL_5804723       | White-Tailed Deer | 12/5/2020       | B.1.311 | Iowa, USA |
| EPI_ISL_5804725       | White-Tailed Deer | 1/9/2021        | B.1.311 | Iowa, USA |
| EPI_ISL_5804726       | White-Tailed Deer | 1/9/2021        | B.1.311 | Iowa, USA |
| EPI_ISL_6425273       | White-Tailed Deer | 12/6/2020       | B.1     | Iowa, USA |
| EPI_ISL_5804727       | White-Tailed Deer | 12/6/2020       | B.1.240 | Iowa, USA |
| EPI_ISL_5804728       | White-Tailed Deer | 12/6/2020       | B.1.311 | Iowa, USA |
| EPI_ISL_5804729       | White-Tailed Deer | 12/6/2020       | B.1     | Iowa, USA |
| EPI_ISL_6425274       | White-Tailed Deer | 12/6/2020       | B.1.240 | Iowa, USA |
| EPI_ISL_5804730       | White-Tailed Deer | 12/6/2020       | B.1     | Iowa, USA |
| EPI_ISL_5804731       | White-Tailed Deer | 12/10/2020      | B.1.234 | Iowa, USA |
| EPI_ISL_5804732       | White-Tailed Deer | 12/10/2020      | B.1.234 | Iowa, USA |
| EPI_ISL_5804733       | White-Tailed Deer | 12/10/2020      | B.1.234 | Iowa, USA |
| EPI_ISL_5804734       | White-Tailed Deer | 12/10/2020      | B.1.234 | Iowa, USA |
| EPI_ISL_5804736       | White-Tailed Deer | 12/8/2020       | B.1     | Iowa, USA |
| EPI_ISL_5804737       | White-Tailed Deer | 12/8/2020       | B.1     | Iowa, USA |
| EPI_ISL_5804738       | White-Tailed Deer | 12/8/2020       | B.1     | Iowa, USA |
| EPI_ISL_5804739       | White-Tailed Deer | 12/9/2020       | B.1     | Iowa, USA |
| EPI_ISL_5804740       | White-Tailed Deer | 12/9/2020       | B.1     | Iowa, USA |
| EPI_ISL_5804741       | White-Tailed Deer | 12/9/2020       | B.1.400 | Iowa, USA |
| EPI_ISL_5804742       | White-Tailed Deer | 12/9/2020       | B.1.2   | Iowa, USA |
| EPI_ISL_5804744       | White-Tailed Deer | 12/7/2020       | B.1     | Iowa, USA |
| EPI_ISL_5804745       | White-Tailed Deer | 12/7/2020       | B.1.2   | Iowa, USA |
| EPI_ISL_5804746       | White-Tailed Deer | 12/5/2020       | B.1.2   | Iowa, USA |
| EPI_ISL_5804747       | White-Tailed Deer | 12/5/2020       | B.1.2   | Iowa, USA |
| EPI_ISL_6425268       | White-Tailed Deer | 12/5/2020       | B.1     | Iowa, USA |
| EPI_ISL_5804748       | White-Tailed Deer | 12/9/2020       | B.1     | Iowa, USA |
| EPI_ISL_6425282       | White-Tailed Deer | 12/9/2020       | B.1.2   | Iowa, USA |
| EPI_ISL_5804749       | White-Tailed Deer | 12/7/2020       | B.1.2   | Iowa, USA |
| EPI_ISL_6425279       | White-Tailed Deer | 12/8/2020       | B.1.2   | Iowa, USA |
| EPI_ISL_6425275       | White-Tailed Deer | 12/7/2020       | B.1.2   | Iowa, USA |
| EPI_ISL_5804757       | White-Tailed Deer | 11/6/2020       | B.1.2   | Iowa, USA |

| Identification number | Host              | Collection date | Lineage | Location  |
|-----------------------|-------------------|-----------------|---------|-----------|
| EPI_ISL_5804750       | White-Tailed Deer | 10/15/2020      | B.1.2   | Iowa, USA |
| EPI_ISL_5804752       | White-Tailed Deer | 12/22/2020      | B.1.234 | Iowa, USA |
| EPI_ISL_5804753       | White-Tailed Deer | 12/15/2020      | B.1.234 | Iowa, USA |
| EPI_ISL_5804754       | White-Tailed Deer | 12/28/2020      | B.1.2   | Iowa, USA |
| EPI_ISL_6425285       | White-Tailed Deer | 11/15/2020      | B.1.2   | Iowa, USA |
| EPI_ISL_6425269       | White-Tailed Deer | 11/30/2020      | B.1.2   | Iowa, USA |
| EPI_ISL_6425272       | White-Tailed Deer | 9/30/2020       | B.1.2   | Iowa, USA |
| EPI_ISL_5804755       | White-Tailed Deer | 11/29/2020      | B.1.2   | Iowa, USA |
| EPI_ISL_5804756       | White-Tailed Deer | 10/28/2020      | B.1.2   | Iowa, USA |
| EPI_ISL_5804758       | White-Tailed Deer | 10/31/2020      | B.1.2   | Iowa, USA |
| EPI_ISL_5804759       | White-Tailed Deer | 11/7/2020       | B.1.2   | Iowa, USA |
| EPI_ISL_5804760       | White-Tailed Deer | 11/8/2020       | B.1.2   | Iowa, USA |
| EPI_ISL_6425286       | White-Tailed Deer | 11/17/2020      | B.1.2   | Iowa, USA |
| EPI_ISL_5804761       | White-Tailed Deer | 11/24/2020      | B.1.2   | Iowa, USA |
| EPI_ISL_5804762       | White-Tailed Deer | 12/5/2020       | B.1.2   | Iowa, USA |
| EPI_ISL_5804763       | White-Tailed Deer | 12/10/2020      | B.1.2   | Iowa, USA |
| EPI_ISL_6425270       | White-Tailed Deer | 12/2/2020       | B.1.2   | Iowa, USA |
| EPI_ISL_6425284       | White-Tailed Deer | 9/28/2020       | B.1.2   | Iowa, USA |
| EPI_ISL_5804764       | White-Tailed Deer | 10/8/2020       | B.1.2   | Iowa, USA |
| EPI_ISL_5804766       | White-Tailed Deer | 11/24/2020      | B.1.2   | Iowa, USA |
| EPI_ISL_5804767       | White-Tailed Deer | 11/24/2020      | B.1.2   | Iowa, USA |
| EPI_ISL_5804768       | White-Tailed Deer | 11/24/2020      | B.1.2   | Iowa, USA |
| EPI_ISL_5804769       | White-Tailed Deer | 11/24/2020      | B.1.2   | Iowa, USA |
| EPI_ISL_5804770       | White-Tailed Deer | 11/24/2020      | B.1.2   | Iowa, USA |
| EPI_ISL_5804771       | White-Tailed Deer | 11/24/2020      | B.1.2   | Iowa, USA |
| EPI_ISL_6425283       | White-Tailed Deer | 11/24/2020      | B.1.2   | Iowa, USA |
| EPI_ISL_6425276       | White-Tailed Deer | 11/24/2020      | B.1.2   | Iowa, USA |
| EPI_ISL_5804772       | White-Tailed Deer | 11/24/2020      | B.1.2   | Iowa, USA |
| EPI_ISL_5804773       | White-Tailed Deer | 11/24/2020      | B.1.2   | Iowa, USA |
| EPI_ISL_5804775       | White-Tailed Deer | 11/24/2020      | B.1.2   | Iowa, USA |
| EPI_ISL_5804776       | White-Tailed Deer | 12/10/2020      | B.1.2   | Iowa, USA |



| Identification number | Host              | Collection date | Lineage | Location            |
|-----------------------|-------------------|-----------------|---------|---------------------|
| EPI_ISL_5804777       | White-Tailed Deer | 12/10/2020      | B.1.2   | Iowa, USA           |
| EPI_ISL_5804778       | White-Tailed Deer | 12/10/2020      | B.1.2   | Iowa, USA           |
| EPI_ISL_5804779       | White-Tailed Deer | 12/10/2020      | B.1.2   | Iowa, USA           |
| EPI_ISL_5804780       | White-Tailed Deer | 12/10/2020      | B.1.2   | Iowa, USA           |
| EPI_ISL_5804781       | White-Tailed Deer | 12/10/2020      | B.1.2   | Iowa, USA           |
| EPI_ISL_5804782       | White-Tailed Deer | 12/10/2020      | B.1.2   | Iowa, USA           |
| EPI_ISL_5804783       | White-Tailed Deer | 12/10/2020      | B.1.2   | Iowa, USA           |
| EPI_ISL_5804784       | White-Tailed Deer | 12/10/2020      | B.1.2   | Iowa, USA           |
| EPI_ISL_5804785       | White-Tailed Deer | 12/23/2020      | B.1.2   | Iowa, USA           |
| EPI_ISL_5804786       | White-Tailed Deer | 11/17/2020      | B.1.2   | Iowa, USA           |
| EPI_ISL_5804787       | White-Tailed Deer | 11/17/2020      | B.1.2   | Iowa, USA           |
| EPI_ISL_6425266       | White-Tailed Deer | 11/18/2020      | B.1.1   | Iowa, USA           |
| EPI_ISL_6425267       | White-Tailed Deer | 12/17/2020      | B.1.2   | Iowa, USA           |
| EPI_ISL_9347708       | White-Tailed Deer | 11/20/2021      | AY.75   | Illinois, USA       |
| EPI_ISL_9347715       | White-Tailed Deer | 11/21/2021      | AY.3    | Illinois, USA       |
| EPI_ISL_9347716       | White-Tailed Deer | 12/6/2021       | AY.3    | Kansas, USA         |
| EPI_ISL_9347717       | White-Tailed Deer | 12/3/2021       | AY.3    | Kansas, USA         |
| EPI_ISL_9347727       | White-Tailed Deer | 12/1/2021       | AY.119  | Massachusetts, USA  |
| EPI_ISL_9347728       | White-Tailed Deer | 11/30/2021      | AY.119  | Massachusetts, USA  |
| EPI_ISL_9347725       | White-Tailed Deer | 12/10/2021      | AY.25   | Maine, USA          |
| EPI_ISL_9347726       | White-Tailed Deer | 12/11/2021      | AY.103  | Maine, USA          |
| EPI_ISL_9347711       | White-Tailed Deer | 12/7/2021       | AY.103  | Minnesota, USA      |
| EPI_ISL_9347712       | White-Tailed Deer | 12/1/2021       | AY.44   | Minnesota, USA      |
| EPI_ISL_9347723       | White-Tailed Deer | 11/20/2021      | AY.103  | North Carolina, USA |
| EPI_ISL_9347724       | White-Tailed Deer | 11/20/2021      | AY.100  | North Carolina, USA |
| EPI_ISL_9347709       | White-Tailed Deer | 12/2/2021       | AY.25   | New Jersey, USA     |
| EPI_ISL_9347710       | White-Tailed Deer | 12/8/2021       | AY.42   | New Jersey, USA     |
| EPI_ISL_9347708       | White-Tailed Deer | 11/24/2021      | P.1     | New York, USA       |
| EPI_ISL_9347715       | White-Tailed Deer | 11/20/2021      | AY.98.1 | New York, USA       |
| EPI_ISL_4878314       | White-Tailed Deer | 1/26/2021       | B.1.582 | Ohio, USA           |
| EPI_ISL_4847029       | White-Tailed Deer | 1/28/2021       | B.1.582 | Ohio, USA           |

| Identification number | Host              | Collection date | Lineage | Location          |
|-----------------------|-------------------|-----------------|---------|-------------------|
| EPI_ISL_4847030       | White-Tailed Deer | 1/28/2021       | B.1.2   | Ohio, USA         |
| EPI_ISL_4878315       | White-Tailed Deer | 2/1/2021        | B.1.2   | Ohio, USA         |
| EPI_ISL_4847031       | White-Tailed Deer | 2/1/2021        | B.1.2   | Ohio, USA         |
| EPI_ISL_4878316       | White-Tailed Deer | 2/2/2021        | B.1.2   | Ohio, USA         |
| EPI_ISL_4847032       | White-Tailed Deer | 2/16/2021       | B.1.2   | Ohio, USA         |
| EPI_ISL_4847033       | White-Tailed Deer | 2/24/2021       | B.1.596 | Ohio, USA         |
| EPI_ISL_4878317       | White-Tailed Deer | 2/25/2021       | B.1.596 | Ohio, USA         |
| EPI_ISL_4878318       | White-Tailed Deer | 2/25/2021       | B.1.596 | Ohio, USA         |
| EPI_ISL_4878319       | White-Tailed Deer | 2/25/2021       | B.1.596 | Ohio, USA         |
| EPI_ISL_4878320       | White-Tailed Deer | 2/25/2021       | B.1.596 | Ohio, USA         |
| EPI_ISL_4878321       | White-Tailed Deer | 2/25/2021       | B.1.596 | Ohio, USA         |
| EPI_ISL_4878322       | White-Tailed Deer | 2/25/2021       | B.1.596 | Ohio, USA         |
| EPI_ISL_9388142       | White-Tailed Deer | 11/20/2021      | AY.25   | Oklahoma, USA     |
| EPI_ISL_9388143       | White-Tailed Deer | 11/20/2021      | AY.25   | Oklahoma, USA     |
| EPI_ISL_9347718       | White-Tailed Deer | 11/28/2021      | AY.107  | Pennsylvania, USA |
| EPI_ISL_9347719       | White-Tailed Deer | 11/28/2021      | B.1.1.7 | Pennsylvania, USA |
| EPI_ISL_9388144       | White-Tailed Deer | 12/4/2021       | AY.100  | Tennessee, USA    |
| EPI_ISL_9347720       | White-Tailed Deer | 12/4/2021       | AY.47   | Tennessee, USA    |
| EPI_ISL_9347721       | White-Tailed Deer | 12/11/2021      | AY.100  | Virginia, USA     |
| EPI_ISL_9347722       | White-Tailed Deer | 12/11/2021      | AY.42   | Virginia, USA     |
| EPI_ISL_10168587      | White-Tailed Deer | 11/6/2021       | AY.44   | Quebec, Canada    |
| EPI_ISL_10169675      | White-Tailed Deer | 11/7/2021       | AY.44   | Quebec, Canada    |
| EPI_ISL_10170149      | White-Tailed Deer | 11/8/2021       | AY.44   | Quebec, Canada    |
| EPI_ISL_10174207      | White-Tailed Deer | 12/1/2021       | B.1     | Ontario, Canada   |
| EPI_ISL_10174960      | White-Tailed Deer | 12/4/2021       | B.1     | Ontario, Canada   |
| EPI_ISL_10175390      | White-Tailed Deer | 11/3/2021       | B.1     | Ontario, Canada   |
| EPI_ISL_10176284      | White-Tailed Deer | 12/1/2021       | D.4     | Ontario, Canada   |
| EPI_ISL_9650712       | White-Tailed Deer | 10/14/2021      | AY.103  | Pennsylvania, USA |
| EPI_ISL_9650797       | White-Tailed Deer | 10/28/2021      | AY.5    | Pennsylvania, USA |
| EPI_ISL_9651200       | White-Tailed Deer | 10/22/2021      | B.1.1.7 | Pennsylvania, USA |
| EPI_ISL_9654019       | White-Tailed Deer | 11/27/2021      | AY.88   | Pennsylvania, USA |

| Identification number | Host                                      | Collection date | Lineage | Location           |
|-----------------------|-------------------------------------------|-----------------|---------|--------------------|
| EPI_ISL_9654444       | White-Tailed Deer                         | 11/27/2021      | B.1.1.7 | Pennsylvania, USA  |
| EPI_ISL_9654523       | White-Tailed Deer                         | 11/28/2021      | AY.88   | Pennsylvania, USA  |
| EPI_ISL_8769311       | Environment - Composite wastewater sample | 12/28/2021      | BA.1.1  | Vienna, Austria    |
| EPI_ISL_9011265       | Environment - Composite wastewater sample | 1/2/2022        | BA.1    | Vienna, Austria    |
| EPI_ISL_9011276       | Environment - Composite wastewater sample | 1/2/2022        | BA.1    | Vienna, Austria    |
| EPI_ISL_9011282       | Environment - Composite wastewater sample | 1/2/2022        | BA.1.1  | Vienna, Austria    |
| EPI_ISL_9011298       | Environment - Composite wastewater sample | 1/1/2022        | BA.1.1  | Vienna, Austria    |
| EPI_ISL_9086969       | Environment - Composite wastewater sample | 1/9/2022        | BA.1.1  | Vienna, Austria    |
| EPI_ISL_9049740       | Hamster                                   | 1/8/2022        | AY.4    | Hong Kong          |
| EPI_ISL_8542936       | Hamster                                   | 11/1/2021       | BA.1.1  | Maharashtra, India |
| EPI_ISL_8372626       | Human                                     | 12/22/2021      | BA.1.1  | New York, USA      |
| EPI_ISL_8372629       | Human                                     | 12/23/2021      | BA.1.1  | New York, USA      |
| EPI_ISL_8372634       | Human                                     | 12/26/2021      | BA.1    | New York, USA      |
| EPI_ISL_8630855       | Human                                     | 12/29/2021      | BA.1    | New York, USA      |
| EPI_ISL_8630857       | Human                                     | 12/29/2021      | BA.1.1  | New York, USA      |
| EPI_ISL_8630859       | Human                                     | 12/30/2021      | BA.1    | New York, USA      |
| EPI_ISL_8630862       | Human                                     | 12/30/2021      | BA.1    | New York, USA      |
| EPI_ISL_8630863       | Human                                     | 12/30/2021      | BA.1    | New York, USA      |
| EPI_ISL_8630864       | Human                                     | 12/31/2021      | BA.1.1  | New York, USA      |
| EPI_ISL_8630865       | Human                                     | 12/31/2021      | BA.1    | New York, USA      |
| EPI_ISL_8630867       | Human                                     | 12/31/2021      | BA.1.1  | New York, USA      |
| EPI_ISL_8630868       | Human                                     | 1/1/2022        | BA.1.1  | New York, USA      |
| EPI_ISL_8630870       | Human                                     | 1/1/2022        | BA.1    | New York, USA      |
| EPI_ISL_8630871       | Human                                     | 1/1/2022        | BA.1    | New York, USA      |
| EPI_ISL_8630872       | Human                                     | 1/1/2022        | BA.1    | New York, USA      |
| EPI_ISL_8630873       | Human                                     | 1/1/2022        | BA.1    | New York, USA      |
| EPI_ISL_8630874       | Human                                     | 1/1/2022        | BA.1    | New York, USA      |
| EPI_ISL_8630875       | Human                                     | 1/1/2022        | BA.1    | New York, USA      |
| EPI_ISL_8630877       | Human                                     | 1/2/2022        | BA.1    | New York, USA      |
| EPI_ISL_8630891       | Human                                     | 1/2/2022        | BA.1    | New York, USA      |

| Identification number | Host  | Collection date | Lineage | Location      |
|-----------------------|-------|-----------------|---------|---------------|
| EPI_ISL_8630892       | Human | 1/2/2022        | BA.1    | New York, USA |
| EPI_ISL_8630893       | Human | 1/2/2022        | BA.1.1  | New York, USA |
| EPI_ISL_8630894       | Human | 1/3/2022        | BA.1.1  | New York, USA |
| EPI_ISL_8630991       | Human | 1/3/2022        | BA.1.1  | New York, USA |
| EPI_ISL_8630997       | Human | 1/4/2022        | BA.1    | New York, USA |
| EPI_ISL_8630998       | Human | 1/4/2022        | BA.1    | New York, USA |
| EPI_ISL_8630999       | Human | 1/4/2022        | BA.1    | New York, USA |
| EPI_ISL_8631001       | Human | 1/4/2022        | BA.1    | New York, USA |
| EPI_ISL_8631002       | Human | 1/4/2022        | BA.1    | New York, USA |
| EPI_ISL_8631004       | Human | 1/5/2022        | BA.1    | New York, USA |
| EPI_ISL_8631029       | Human | 1/4/2022        | BA.1    | New York, USA |
| EPI_ISL_8631031       | Human | 1/5/2022        | BA.1    | New York, USA |
| EPI_ISL_8631032       | Human | 1/5/2022        | BA.1    | New York, USA |
| EPI_ISL_8631033       | Human | 1/5/2022        | BA.1    | New York, USA |
| EPI_ISL_8631034       | Human | 1/6/2022        | BA.1    | New York, USA |
| EPI_ISL_8631035       | Human | 1/3/2022        | BA.1.1  | New York, USA |
| EPI_ISL_8977456       | Human | 1/6/2022        | BA.1.1  | New York, USA |
| EPI_ISL_8977457       | Human | 1/6/2022        | BA.1.1  | New York, USA |
| EPI_ISL_8977536       | Human | 1/7/2022        | BA.1    | New York, USA |
| EPI_ISL_8977458       | Human | 1/7/2022        | BA.1.1  | New York, USA |
| EPI_ISL_8977459       | Human | 1/7/2022        | BA.1    | New York, USA |
| EPI_ISL_8977460       | Human | 1/8/2022        | BA.1.1  | New York, USA |
| EPI_ISL_8977525       | Human | 1/5/2022        | BA.1    | New York, USA |
| EPI_ISL_8977548       | Human | 1/8/2022        | BA.1    | New York, USA |
| EPI_ISL_8977461       | Human | 1/8/2022        | BA.1    | New York, USA |
| EPI_ISL_8977462       | Human | 1/9/2022        | BA.1.1  | New York, USA |
| EPI_ISL_8977541       | Human | 1/9/2022        | BA.1    | New York, USA |
| EPI_ISL_8977496       | Human | 1/10/2022       | BA.1    | New York, USA |
| EPI_ISL_8977497       | Human | 1/10/2022       | BA.1.1  | New York, USA |
| EPI_ISL_8977524       | Human | 1/10/2022       | BA.1    | New York, USA |
| EPI_ISL_8977498       | Human | 1/10/2022       | BA.1.1  | New York, USA |

| Identification number | Host  | Collection date | Lineage | Location        |
|-----------------------|-------|-----------------|---------|-----------------|
| EPI_ISL_8977499       | Human | 1/10/2022       | BA.1    | New York, USA   |
| EPI_ISL_8977533       | Human | 1/10/2022       | BA.1.1  | New York, USA   |
| EPI_ISL_8977500       | Human | 1/7/2022        | BA.1    | New York, USA   |
| EPI_ISL_8977501       | Human | 1/8/2022        | BA.1.1  | New York, USA   |
| EPI_ISL_8977502       | Human | 1/8/2022        | BA.1.1  | New York, USA   |
| EPI_ISL_8977503       | Human | 1/9/2022        | BA.1    | New York, USA   |
| EPI_ISL_8977504       | Human | 1/9/2022        | BA.1    | New York, USA   |
| EPI_ISL_8977505       | Human | 1/9/2022        | BA.1.1  | New York, USA   |
| EPI_ISL_8977542       | Human | 1/10/2022       | BA.1.1  | New York, USA   |
| EPI_ISL_8977530       | Human | 1/10/2022       | BA.1    | New York, USA   |
| EPI_ISL_8977534       | Human | 1/11/2022       | BA.1    | New York, USA   |
| EPI_ISL_8977425       | Human | 1/11/2022       | BA.1.1  | New York, USA   |
| ON-PHL-21-44225       | Human | 02/03/2022      | D.4     | Ontario, Canada |

# Denotes the eight newly sequenced white-tailed deer SARS-CoV-2 genomes from this study. These new sequences are together with 64 representatively selected human-origin Omicron SARS-CoV-2 genomes circulating in New York City and Canada between December 2021 and February 2022 and 155 other white-tailed deer origin SARS-CoV-2 isolates, which are available in GISAID. An additional six environmentally derived (wastewater) origin and two hamster origin SARS-CoV-2 isolates were also included.
